# Supplementary material
Source: publisher figshare collection journal article supplement (https://karger.figshare.com/ndownloader/files/28376913)
Supplement: Supplementary file 1 [file 28376913]

| **Author / title** | N of contacts | X raw | adjusted X* | **X MNI** | Y raw | adjusted Y* | ACPC size (cm) | **Y MNI** | Z raw | adjusted Z* | **Z MNI** |
| --- | --- | --- | --- | --- | --- | --- | --- | --- | --- | --- | --- |
| **Saint-Cyr et al. J Neurosurg 2002 (average)** | 54 | 11.72 | 11.9 | **13** | -1.62 | -1.6  (-13.3 Talairach) | 23 | **-12** | -2.47 | -2.5 | **-8** |
| **Vergani et al. Surgical Neurology 2007 (average)** | 50 | 11.69 | 11.8 | **13** | -0.81 | -0.8  (-12.5 Talairach) | 23 | **-11** | -1.03 | -1 | **-6** |
| **Eisenstein et al. Annals of Neurology 2014 (right STN)** | 45 | 12 | 9.8 | **11** | -5.25 (-19,5) ** | -4.3  (-15.9 Talairach) | 28.5 | **-15** | -2.5 | -2 | **-7** |
| **Garcia-Garcia et al. Neurosurg 2016 (both sides)** | 61 | 12.03 | 10.4 | **11** | -1.1 | -0.9  (-12.6 Talairach) | 27 | **-12** | -1.46 | -1.3 | **-6** |
| **Akram et al. Neuroimage. 2017 (average)** | 40 | 9# | 9# | **10** | -2.4 (-14)  **# | -2.4  (-14 Talairach) | 26.2 | **-13** | -2# | -2# | **-7** |
| **Gourisankar et al. R. Soc. open sci. 2018 (most affected side)** | 148 | 12 | 9.8 | **11** | -6.3 (-20,5) ** | -5.1  (-16.7 Talairach) | 28.5 | **-16** | -3.5 | -2.9 | **-8** |
| **Dembek et al. Annals of Neurology. 2019 (Right STN)** | 99 (both sides) | 11# | 11# | **12** | - 2.4 (-14) **# | -2.4  (-14 Talairach) | 26.2 | **-13** | 0# | 0.0# | **-5** |

Supplementary table 5: average contact coordinates.

Average of all studies: x: 10.5mm (±1), y: -2.5mm (±1.7), z: -2.8mm (±1). *coordinates were first corrected for an AC-PC length of 23.29mm, which corresponds to the Talairach Brain, as reported by Horn et al. Neuroimage. 2017 April 15; 150: 395–404 (adjusted). Antero-posterior MCP based coordinates were then expressed in from the anterior commissure by adding half of the AC-PC length (11.65mm). **converted into MCP based coordinates from AC based coordinates by adding half of the AC-PC length used in the study. Then an online converter was used to convert Talairach coordinates into MNI based coordinates in order to plot all the average coordinates from the different studies into a single MNI template (<http://sprout022.sprout.yale.edu/mni2tal/mni2tal.html>). #coordinates given in MNI and converted into Talairach using the same tool.
